# Supplementary material for: Hedgehog-like polycrystalline Si as anode material for high performance Li-ion battery
Source: Royal Society of Chemistry journal article supplement (doi:10.1039/c4ra12760a), 2014-01-01
Supplement: c4ra12760a1.pdf [file c4ra12760a1.pdf]

## Supplementary Information

(MS # RA-COM-09-2014-009555)

# Hedgehog-like polycrystalline Si as anode material for high performance Li-ion battery

Chunqian Zhang<sup>a</sup>, Chuanbo Li\*<sup>a</sup>, Feihu Du<sup>b</sup>, Kaixue Wang<sup>b</sup>, Chunlai Xue<sup>a</sup>, Buwen Cheng<sup>a</sup>  
and Qiming Wang<sup>a</sup>

Figure 1s shows the columbic efficiency (CE) and specific capacity of the cell with hedgehog-like Si particle as anode at different charge/discharge rate. The CE decrease a little bit at higher rate but can keeps above 96.5%.

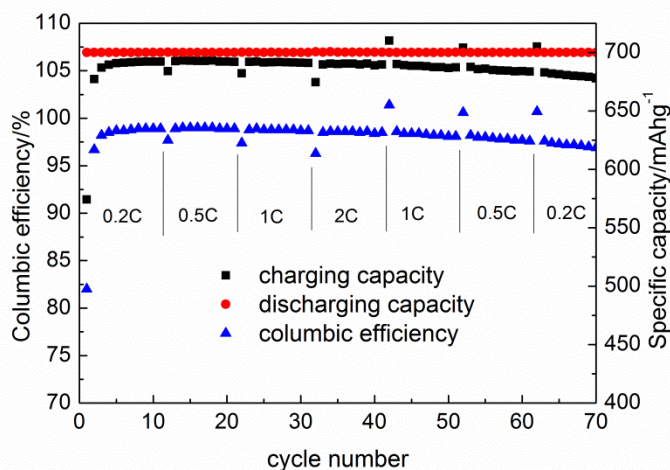

Figure 1s. The charge/discharge capacity and columbic efficiency at different rate.

Figure 2s has given the columbic efficiency and specific capacity of the cell with hedgehog-like Si particle as anode with a fixed discharging capacity of 1100 mAh g<sup>-1</sup>. It can be seen that the CE reaches 79.4% in the 1<sup>st</sup> cycle, and has the comparable columbic efficiency in the followed cycles compared to that cycled at a discharging capacity of 700 mAh/g.

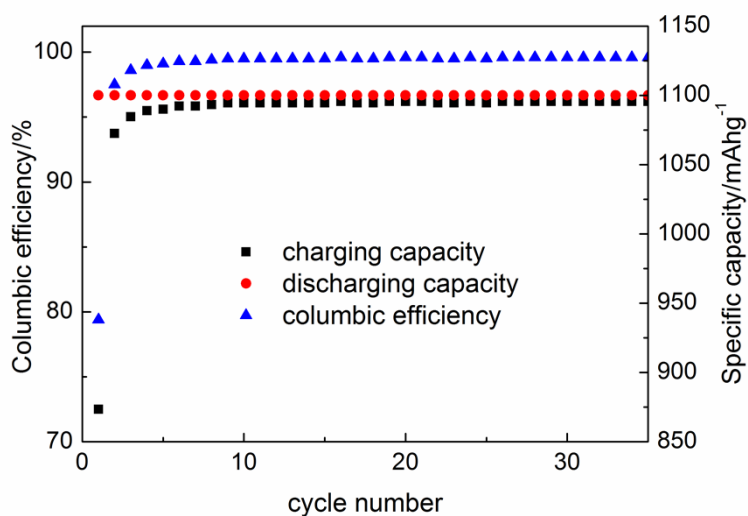

Figure 2s. The charging/discharging capacity and columbic efficiency at discharging capacity of 1100 mAh/g.

Figure 3s shows the charging/discharging capacity and columbic efficiency with a high active mass loading. The performance of battery can keep well.

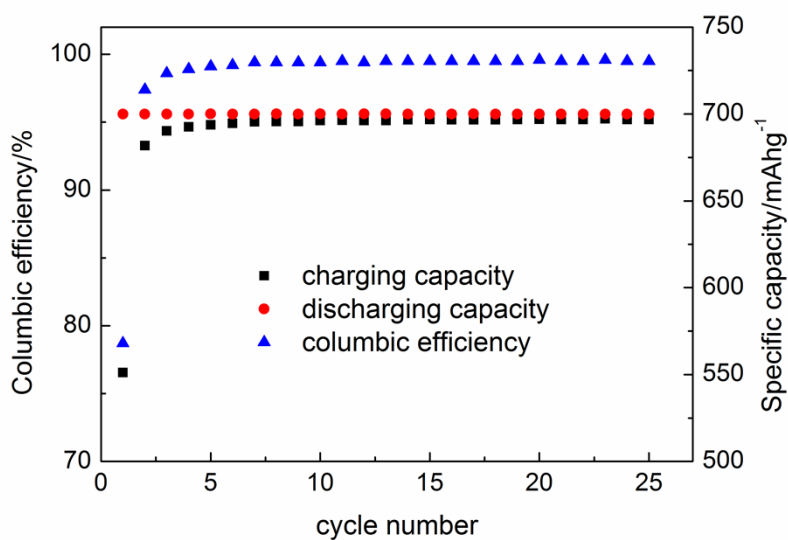

Figure 3s The charging/discharging capacity and columbic efficiency with a high active mass loading
